# Supplementary material for: Inter-relationships between Gender, Frailty and 10-Year Survival in Older Italian Adults: an observational longitudinal study
Source: PubMed Central journal article supplement (PMC6895198; doi:10.1038/s41598-019-54897-2), 2019-12-05
Supplement: 41598_2019_54897_MOESM1_ESM.pdf [file 41598_2019_54897_MOESM1_ESM.pdf]

**Inter-relationships between Gender, Frailty and 10-Year Survival in Older Italian Adults: an  
observational longitudinal study**

Graziamaria Corbi, Francesco Cacciatore, Klara Komici, Giuseppe Rengo, Dino Franco Vitale, Giuseppe Furgi,  
Gennaro Pagano, Leonardo Bencivenga, Sergio Davinelli, Nicola Ferrara

**Supplemental Table 1. Characteristics of study population at 10-year survival stratified by health status and gender**

| Variables                                    | Alive          |                |                  |             | Dead           |                |                  |             |
|----------------------------------------------|----------------|----------------|------------------|-------------|----------------|----------------|------------------|-------------|
|                                              | All<br>(n=604) | Men<br>(n=229) | Women<br>(n=375) | <i>p</i>    | All<br>(n=680) | Men<br>(n=323) | Women<br>(n=357) | <i>p</i>    |
| <b>Age, years mean (SD)</b>                  | 71.65 (4.89)*  | 71.32(4.47)*   | 71.86(5.12)*     | .190        | 76.44(6.69)    | 75.39(6.31)    | 77.39(6.89)      | <.001       |
| <b>BMI, kg/m<sup>2</sup> mean (SD)</b>       | 26.73 (4.70)   | 26.09(4.17)    | 27.11 (4.96)     | <b>.014</b> | 26.41 (5.09)   | 25.75 (3.99)   | 27.03 (5.88)     | <b>.001</b> |
| <b>Waist circumference, cm mean (SD)</b>     | 95.40 (15.87)  | 96.45(15.14)   | 94.77 (16.29)    | .247        | 96.06 (16.65)  | 96.15 (15.73)  | 95.98 1(7.51)    | .903        |
| <b>Charlson comorbidity index, mean (SD)</b> | 1.27 (1.42)*   | 1.10 (1.11)*   | 1.38 (1.57)*     | <b>.018</b> | 1.98 (1.81)    | 1.88 (1.74)    | 2.05 (1.87)      | .228        |
| <b>Drugs number, mean (SD)</b>               | 1.87 (1.81)*   | 1.58 (1.69)*   | 2.04(1.86)*      | <b>.002</b> | 2.65 (2.20)    | 2.32 (2.04)    | 2.95 (2.31)      | <.001       |
| <b>Hypertension, n (%)</b>                   | 450 (74.5)     | 165 (72.1)     | 285 (76.0)^      | .280        | 520 (76.5)     | 228 (70.6)     | 292 (81.8)       | <b>.001</b> |
| <b>Diabetes, n (%)</b>                       | 62 (10.3)*     | 14 (6.1)*      | 48 (12.8)*       | <b>.009</b> | 125 (18.4)     | 48 (14.9)      | 77 (21.6)        | <b>.024</b> |
| <b>CAD, n (%)</b>                            | 23 (3.8)*      | 11 (4.8)*      | 12 (3.2)         | .318        | 47 (6.9)       | 35 (10.8)      | 12 (3.4)         | <.001       |
| <b>CHF, n (%)</b>                            | 27 (4.5)*      | 6 (2.6)*       | 21 (5.7)*        | .080        | 93 (13.9)      | 42 (13.2)      | 51 (14.7)        | .579        |
| <b>COPD, n (%)</b>                           | 191 (31.6)*    | 97 (42.2)      | 94 (25.1)        | <.001       | 297 (43.7)     | 171 (52.9)     | 126 (35.3)       | <.001       |
| <b>CKD, n (%)</b>                            | 20 (3.3)       | 9 (3.9)        | 11 (2.9)         | .507        | 33 (4.9)       | 16 (5.0)       | 17 (4.8)         | .908        |
| <b>Neurological diseases, n (%)</b>          | 66 (10.9)*     | 17 (7.4)       | 49 (13.1)        | <b>.031</b> | 102 (15.0)     | 39 (12.1)      | 63 (17.6)        | <b>.042</b> |
| <b>Frail, n (%)</b>                          | 163 (27.0)*    | 36 (15.1)*     | 127 (33.9)*      | <.001       | 368 (54.1)     | 127 (39.3)     | 241 (67.5)       | <.001       |

BMI, Body Mass, Index; CAD, Coronary Artery Disease; CHF, Chronic Heart Failure; COPD, Chronic Obstructive Pulmonary Diseases; CKD, Chronic Kidney Disease

\* p <0.05 versus dead; ^ p=0.05

**Inter-relationships between Gender, Frailty and 10-Year Survival in Older Italian Adults: an observational longitudinal study**

Graziamaria Corbi, Francesco Cacciatore, Klara Komici, Giuseppe Rengo, Dino Franco Vitale, Giuseppe Furgi, Gennaro Pagano, Leonardo Bencivenga, Sergio Davinelli, Nicola Ferrara.

# STROBE Statement

Checklist of items that should be included in reports of observational studies

| Section/Topic                         | Item No | Recommendation                                                                                                                                                                       | Reported on Page No |
|---------------------------------------|---------|--------------------------------------------------------------------------------------------------------------------------------------------------------------------------------------|---------------------|
| <b>Title and abstract</b>             | 1       | (a) Indicate the study's design with a commonly used term in the title or the abstract                                                                                               | 1                   |
|                                       |         | (b) Provide in the abstract an informative and balanced summary of what was done and what was found                                                                                  | 2                   |
| <b>Introduction</b>                   |         |                                                                                                                                                                                      |                     |
| Background/rationale                  | 2       | Explain the scientific background and rationale for the investigation being reported                                                                                                 | 3,4                 |
| Objectives                            | 3       | State specific objectives, including any prespecified hypotheses                                                                                                                     | 4                   |
| <b>Methods</b>                        |         |                                                                                                                                                                                      |                     |
| Study design                          | 4       | Present key elements of study design early in the paper                                                                                                                              | 10                  |
| Setting                               | 5       | Describe the setting, locations, and relevant dates, including periods of recruitment, exposure, follow-up, and data collection                                                      | 10-14               |
| Participants                          | 6       | (a) <i>Cohort study</i> —Give the eligibility criteria, and the sources and methods of selection of participants. Describe methods of follow-up                                      | 10-14               |
|                                       |         | (b) <i>Cohort study</i> —For matched studies, give matching criteria and number of exposed and unexposed                                                                             | NA                  |
| Variables                             | 7       | Clearly define all outcomes, exposures, predictors, potential confounders, and effect modifiers. Give diagnostic criteria, if applicable                                             | 10-14               |
| Data sources/measurement              | 8*      | For each variable of interest, give sources of data and details of methods of assessment (measurement). Describe comparability of assessment methods if there is more than one group | 11,12               |
| Bias                                  | 9       | Describe any efforts to address potential sources of bias                                                                                                                            | NA                  |
| Study size                            | 10      | Explain how the study size was arrived at                                                                                                                                            | 11,12               |
| Quantitative variables                | 11      | Explain how quantitative variables were handled in the analyses. If applicable, describe which groupings were chosen and why                                                         | 10-14               |
|                                       |         | (a) Describe all statistical methods, including those used to control for confounding                                                                                                | 12-14               |
| Statistical methods                   | 12      | (b) Describe any methods used to examine subgroups and interactions                                                                                                                  | 12-14               |
|                                       |         | (c) Explain how missing data were addressed                                                                                                                                          | 12-14               |
|                                       |         | (d) <i>Cohort study</i> —If applicable, explain how loss to follow-up was addressed                                                                                                  | NA                  |
|                                       |         | <i>Case-control study</i> —If applicable, explain how matching of cases and controls was addressed                                                                                   |                     |
|                                       |         | <i>Cross-sectional study</i> —If applicable, describe analytical methods taking account of sampling strategy                                                                         | NA                  |
| (e) Describe any sensitivity analyses | NA      |                                                                                                                                                                                      |                     |
